# Supplementary material
Source: publisher figshare collection journal article supplement (https://sage.figshare.com/ndownloader/files/20375889)
Supplement: Supplementary file 1 [file 20375889]

## Online Supplemental Material

## **Appendix: WISDM Study Group**

A listing of the Wireless Innovation for Seniors with Diabetes Mellitus (WISDM) sites with participating principal investigators (PI), co-investigators (I), primary coordinator (PC) and coordinators (C) is included below:

**Icahn School of Medicine at Mt Sinai New York, NY** Carol Levy, MD, CDE (PI); David Lam, MD (I); Grenye O'Malley, MD (I); Camilla Levister. NP, CDE (I); Nirali Shah, MD (I); Selassie Ogyaadu, MD, MPH (PC);

**Mayo Clinic Rochester, MN** Yogish Kudva, MD (PI); Vinaya Simha, MD (I); Shelly McCrady Spitzer (C); Corey Reid (PC); V Dadlani (C);

**International Diabetes Center/Park Nicollet Minneapolis, MN** Anders Carlson, MD (PI); Richard Bergenstal, MD (I); Marcia Madden, MPH, RN, CNP, CDE (I); Thomas Martens, MD (I); Sean Dunnigan, RN (PC); Kathleen McCann, RN (C);

**University of Washington, Diabetes Care Center Seattle, WA** Irl Hirsch, MD (PI); Dace Trencze, MD FACE (I); Subbulaxmi Trikudanathan, MD, MRCP, MMSc (I); Lorena Wright, MD (I); Andrea Toulouse, MS (PC); Dori Khakpour, RDN, CD, CDE (C); Lori Sameshima, RN (C); Nancy Sanborn, ND, CDE (C)

**Naomi Berrie Diabetes Center, Columbia University New York City, NY** Robin Goland, MD (PI); Lauren Golden, MD (I); Sarah Pollak, RN, MSN (PC); Courtney Melrose, MPH, RDN, CDE (C); Analia Alvarez, RN, BSN (C); Elizabeth Robinson (C); Eleanor Zagoren (C);

**University of North Carolina Diabetes Care Center Chapel Hill, NC** Laura Young, MD, PhD (PI); Elizabeth Harris, MD, FACE (I); John Buse, MD, PhD (I); Katherine Bergamo, BSN, MSN, FNP-C (I); Marian Sue Kirkman, MD (I); Jean Dostou, MD, FACE (I); Alexander Kass, BSN, RN, CDE (PC); Milana Dezube, BSN, RN, CDE (C); Rahul Kathard (C); Jamie C Diner, BSN, RN, CDE (C);

**Henry Ford Health System Detroit, MI** Davida Kruger, NP (PI); Natalie Corker (PC); Heather Remtema (C);

**Keck School of Medicine of University of Southern California Los Angeles, CA** Anne Peters, MD (PI); Mark Harmel, MPH, CDE (PC);

**SUNY Upstate Medical University Syracuse, NY** Ruth Weinstock, MD, PhD (PI); Suzan Bzdick, RN, CDE (PC);

**Atlanta Diabetes Associates Atlanta, GA** Bruce Bode, MD (PI); Jennifer Boyd, PA (I); Joseph Johnson, PA (I); Lisa Kiblinger, RN, NP-C, CDE (I); Jonathan Ownby, MD (I); Nitin Rastogi, MBBS (PC); Blake Winslett (C); Tracy Lawrence (C);

**Harold Schnitzer Diabetes Health Center at Oregon Health and Science University**

**Portland, OR** Andrew Ahmann, MD (PI); Jessica Castle, MD (I); Farahnaz Joarder, MD (I); Diana Aby-Daniel, PA (I); Victoria Morimoto, PA (I); Kathryn Hanavan, RN, NP (I); Kristin Jahnke (PC); Rebecca Fitch (C); Brianna Morales-Gomez (C);

**Washington University St. Louis, MO** Janet McGill, MD (PI); Maamoun Salam, MD (I); Stacy Hurst, RN, BSN, CDE (PC); Mary Jane Clifton, CCRP (C); Carol Recklein, RN, MHS, CDE (C); Toni Schweiger, RN (C); Alex Goay, BA (C);

**Northwestern University Chicago, IL** Grazia Aleppo, MD (PI); Emily Szmuiłowicz, MD (I); Elaine Massaro, MS RN, CDE (PC); Anupam Bansal, MD (C);

**University of Miami, Division of Endocrinology, Diabetes & Metabolism, FL** Francesco Vendrame, MD, PhD (PI); Natalia Sanders-Branca, MD (PC); Della Matheson, RN, CDE (C);

**University of Michigan Ann Arbor, MI** Rodica Pop-Busui, MD, PhD (PI); Lynn Ang, MD (I); Kara Mizokami-Stout, MD (I); Cynthia Plunkett, RN (PC); Brittany Plunkett (C); Virginia Leone (C)

**University of Pennsylvania Perelman School of Medicine/Rodebaugh Diabetes Center Philadelphia, PA** Michael Rickels, MD, MS (PI); Amy Peleckis, MSN, CRNP (I); Cornelia Dalton-Bakes, MS, CCRC (PC); Eileen Markmann, BSN (C);

**University of Massachusetts Medical School Worcester, MA** Michael Thompson, MD (PI); Nina Rosano, MD (I); Celia Hartigan, RN, MPH (PC);

**Iowa Diabetes and Endocrinology Research Center, West Des Moines, IA** Anuj Bhargava, MD (PI); Kathleen Fitzgerald, RN (I); Kirstie Stifel (PC); Lisa Borg (C);

**AdventHealth, The Translational Research Institute Orlando, FL** Richard Pratley, MD (PI); Melissa Rooney, ARNP (I); Heather Richmod, PA (I); Karthik Chivukula, MD (I); Keri Whitaker, RN (PC); Karla Flores Perez (C);

**The University of Chicago Chicago, IL** Louis Phillipson, MD, PhD (PI); Celeste Thomas, MD, MS (I); Gail Gannon, APN, FNP-C (I); Mariko Pusinello, APN, RN (C) (C);

**University of Colorado/Denver, Barbara Davis Center for Diabetes Aurora, CO** Viral Shah, MD (PI); Halis Kaan Akturk, MD (I); Hal Joseph, PA-C (I); Lisa Myers (PC); Prakriti Joshee (C); Elizabeth Beck (C);

**Scripps Whittier Diabetes Institute San Diego, CA** Athena Philis-Tsimikas, MD (PI); George Dailey, MD (I); Amy Chang, MD (I); James McCallum, MD (I); Maria Isabel Garcia, RN (PC); Rosario Rosal (C);

**Jaeb Center for Health Research Tampa, FL** Kellee M. Miller, PhD Alandra Verdejo, MPH, Nicole Reese, BS, David McNabb, AS, Heidi Strayer, PhD, Kamille Janess, BS, Israel Mahr, MS, Lauren Kanapka, MSc, Craig Kollman PhD, Roy Beck, MD, PhD

**WISDM Operations Committee Members:** Richard Pratley, MD, Michael Rickels, MD, MPH, Naomi Chaytor, PhD, Steven Fox, MD, Kellee M. Miller, PhD

**Supplemental Table S1: Rate of CGM Measured Hypoglycemic Events per Week<sup>a</sup>**

|                                             | N   | Rate of Hypoglycemic Events per Week |                                 |                                     |
|---------------------------------------------|-----|--------------------------------------|---------------------------------|-------------------------------------|
|                                             |     | Median (Q1, Q3)                      | Univariate P-Value <sup>b</sup> | Multivariate P-Value <sup>b,c</sup> |
| <b>Overall</b>                              | 203 | 2.4 (1.1, 4.0)                       | -                               | -                                   |
| <b>Age (years)<sup>d</sup></b>              |     |                                      | 0.22                            | -                                   |
| 60-<65                                      | 55  | 2.6 (1.1, 4.4)                       |                                 |                                     |
| 65-<70                                      | 82  | 2.7 (0.7, 4.1)                       |                                 |                                     |
| ≥70                                         | 66  | 2.0 (1.1, 3.3)                       |                                 |                                     |
| <b>Sex</b>                                  |     |                                      | 0.22                            | 0.17                                |
| Female                                      | 105 | 2.7 (1.5, 4.2)                       |                                 |                                     |
| Male                                        | 98  | 2.0 (0.7, 3.7)                       |                                 |                                     |
| <b>Race/Ethnicity</b>                       |     |                                      | 0.39                            | -                                   |
| White non-Hispanic                          | 187 | 2.4 (1.0, 3.9)                       |                                 |                                     |
| Non-White                                   | 14  | 3.4 (1.7, 6.2)                       |                                 |                                     |
| <b>Annual Household Income</b>              |     |                                      | 0.49                            | -                                   |
| <\$35,000                                   | 21  | 2.8 (1.6, 3.8)                       |                                 |                                     |
| \$35,000-<\$75,000                          | 43  | 2.7 (1.1, 4.1)                       |                                 |                                     |
| ≥\$75,000                                   | 78  | 2.1 (1.1, 3.8)                       |                                 |                                     |
| <b>Education Level</b>                      |     |                                      | 0.14                            | 0.22                                |
| High school or less                         | 12  | 3.7 (3.1, 6.3)                       |                                 |                                     |
| Some college or college degree              | 128 | 2.5 (1.0, 4.0)                       |                                 |                                     |
| Graduate or professional degree             | 61  | 2.1 (0.7, 3.1)                       |                                 |                                     |
| <b>Health Insurance</b>                     |     |                                      | 0.47                            | -                                   |
| Private                                     | 57  | 3.1 (1.1, 5.5)                       |                                 |                                     |
| Private and Medicare                        | 70  | 2.2 (1.1, 3.8)                       |                                 |                                     |
| Medicare/Other                              | 76  | 2.5 (1.0, 3.7)                       |                                 |                                     |
| <b>Live Alone</b>                           |     |                                      | 0.49                            | -                                   |
| No                                          | 153 | 2.3 (1.0, 3.9)                       |                                 |                                     |
| Yes                                         | 50  | 2.8 (1.6, 4.0)                       |                                 |                                     |
| <b>Employment Status</b>                    |     |                                      | 0.66                            | -                                   |
| Employed/Self-employed                      | 76  | 2.6 (1.0, 3.8)                       |                                 |                                     |
| Retired                                     | 118 | 2.2 (1.0, 4.0)                       |                                 |                                     |
| Unemployed                                  | 9   | 2.8 (2.2, 4.1)                       |                                 |                                     |
| <b>BMI (kg/m<sup>2</sup>)<sup>d</sup></b>   |     |                                      | 0.49                            | -                                   |
| Underweight/Normal weight (<25)             | 72  | 2.6 (0.9, 3.7)                       |                                 |                                     |
| Overweight (25-29.9)                        | 75  | 2.7 (1.6, 5.2)                       |                                 |                                     |
| Obese (≥30)                                 | 53  | 1.7 (0.7, 3.8)                       |                                 |                                     |
| <b>T1D Duration (years)<sup>d</sup></b>     |     |                                      | 0.40                            | -                                   |
| <25                                         | 51  | 2.1 (0.6, 3.7)                       |                                 |                                     |
| 25-<50                                      | 107 | 2.6 (1.4, 4.7)                       |                                 |                                     |
| ≥50                                         | 45  | 2.6 (1.0, 3.8)                       |                                 |                                     |
| <b>Age at Diagnosis (years)<sup>d</sup></b> |     |                                      | 0.24                            | -                                   |
| <25                                         | 75  | 2.8 (1.5, 4.7)                       |                                 |                                     |
| 25-<50                                      | 95  | 2.1 (1.1, 4.2)                       |                                 |                                     |
| ≥50                                         | 33  | 2.0 (0.6, 3.3)                       |                                 |                                     |
| <b>Insulin Delivery Method</b>              |     |                                      | 0.53                            | -                                   |
| Injections                                  | 95  | 2.8 (0.9, 4.7)                       |                                 |                                     |
| Pump                                        | 108 | 2.2 (1.2, 3.6)                       |                                 |                                     |

|                                                                      | N   | Rate of Hypoglycemic Events per Week |                                 |                                     |
|----------------------------------------------------------------------|-----|--------------------------------------|---------------------------------|-------------------------------------|
|                                                                      |     | Median (Q1, Q3)                      | Univariate P-Value <sup>b</sup> | Multivariate P-Value <sup>b,c</sup> |
| <b>Total Daily Insulin (units per kg of body weight)<sup>d</sup></b> |     |                                      |                                 |                                     |
| <0.5                                                                 | 89  | 2.2 (0.9, 3.6)                       | 0.22                            | 0.14                                |
| ≥0.5                                                                 | 103 | 2.7 (1.1, 4.4)                       |                                 |                                     |
| <b>Prior CGM use</b>                                                 |     |                                      |                                 |                                     |
| Prior CGM use                                                        | 93  | 2.6 (0.9, 3.7)                       | 0.77                            | -                                   |
| No prior CGM use                                                     | 110 | 2.3 (1.1, 4.1)                       |                                 |                                     |
| <b>Average BGM Checks Per Day<sup>d</sup></b>                        |     |                                      |                                 |                                     |
| <4                                                                   | 50  | 2.8 (1.1, 4.7)                       | 0.40                            | -                                   |
| ≥4                                                                   | 153 | 2.3 (1.0, 3.8)                       |                                 |                                     |
| <b>Detectable C-peptide</b>                                          |     |                                      |                                 |                                     |
| No                                                                   | 157 | 2.6 (1.4, 4.1)                       | 0.18                            | -                                   |
| Yes                                                                  | 46  | 1.7 (0.5, 3.6)                       |                                 |                                     |
| <b>Reduced Hypoglycemia Awareness</b>                                |     |                                      |                                 |                                     |
| Yes                                                                  | 61  | 2.8 (2.0, 5.6)                       | 0.03                            | 0.05                                |
| No                                                                   | 138 | 2.1 (0.8, 3.7)                       |                                 |                                     |

- A hypoglycemic event was defined as 15 consecutive minutes with a sensor glucose value <54 mg/dL. The end of the hypoglycemic event was defined as a minimum of 15 consecutive minutes with a sensor glucose concentration ≥70 mg/dL.
- P-values have been adjusted for multiple comparisons using the adaptive Benjamini-Hochberg procedure to control the false discovery rate.
- Only variables with  $P < 0.1$  in a multivariate model were included in the final model. P-values are only given for variables that were selected in the final model.
- Entered in the models as continuous variables. Categories are for displaying descriptive information only, not regression.

**Supplemental Table S2: Daytime (6am -<12am) and Nighttime (12am-<6am) % Time <54 mg/dL**

|                                           | N   | Daytime % Time <54 mg/dL |                                 |                                     | Nighttime % Time <54 mg/dL |                                 |                                     |
|-------------------------------------------|-----|--------------------------|---------------------------------|-------------------------------------|----------------------------|---------------------------------|-------------------------------------|
|                                           |     | Median (Q1, Q3)          | Univariate P-Value <sup>a</sup> | Multivariate P-Value <sup>a,b</sup> | Median (Q1, Q3)            | Univariate P-Value <sup>a</sup> | Multivariate P-Value <sup>a,b</sup> |
| <b>Overall</b>                            | 203 | 1.4% (0.5%, 3.1%)        | -                               | -                                   | 1.4% (0.0%, 5.5%)          | -                               | -                                   |
| <b>Age (years)<sup>c</sup></b>            |     |                          | 0.07                            | -                                   |                            | 0.97                            | -                                   |
| 60-<65                                    | 55  | 2.0% (0.7%, 3.8%)        |                                 |                                     | 1.9% (0.0%, 5.8%)          |                                 |                                     |
| 65-<70                                    | 82  | 1.4% (0.5%, 3.2%)        |                                 |                                     | 1.5% (0.0%, 5.7%)          |                                 |                                     |
| ≥70                                       | 66  | 1.2% (0.4%, 2.2%)        |                                 |                                     | 1.0% (0.0%, 4.0%)          |                                 |                                     |
| <b>Sex</b>                                |     |                          | 0.32                            | -                                   |                            | 0.97                            | -                                   |
| Female                                    | 105 | 1.6% (0.7%, 3.2%)        |                                 |                                     | 1.9% (0.0%, 5.7%)          |                                 |                                     |
| Male                                      | 98  | 1.2% (0.4%, 3.0%)        |                                 |                                     | 1.2% (0.0%, 5.1%)          |                                 |                                     |
| <b>Race/Ethnicity</b>                     |     |                          | 0.48                            | -                                   |                            | 0.97                            | -                                   |
| White non-Hispanic                        | 187 | 1.4% (0.5%, 3.1%)        |                                 |                                     | 1.4% (0.0%, 5.5%)          |                                 |                                     |
| Non-White                                 | 14  | 1.8% (1.2%, 3.7%)        |                                 |                                     | 5.0% (0.0%, 5.7%)          |                                 |                                     |
| <b>Annual Household Income</b>            |     |                          | 0.38                            | -                                   |                            | 0.99                            | -                                   |
| <\$35,000                                 | 21  | 2.5% (1.1%, 4.7%)        |                                 |                                     | 2.7% (0.0%, 5.2%)          |                                 |                                     |
| \$35,000-<\$75,000                        | 43  | 1.5% (0.4%, 2.4%)        |                                 |                                     | 1.4% (0.0%, 5.8%)          |                                 |                                     |
| ≥\$75,000                                 | 78  | 1.4% (0.4%, 3.1%)        |                                 |                                     | 1.4% (0.0%, 5.5%)          |                                 |                                     |
| <b>Education Level</b>                    |     |                          | 0.03                            | 0.04                                |                            | 0.97                            | -                                   |
| High school or less                       | 12  | 2.6% (1.8%, 7.2%)        |                                 |                                     | 2.4% (0.4%, 5.6%)          |                                 |                                     |
| Some college or college degree            | 128 | 1.4% (0.5%, 3.1%)        |                                 |                                     | 1.7% (0.0%, 5.7%)          |                                 |                                     |
| Graduate or professional degree           | 61  | 1.2% (0.4%, 2.5%)        |                                 |                                     | 1.2% (0.0%, 4.0%)          |                                 |                                     |
| <b>Health Insurance</b>                   |     |                          | 0.37                            | -                                   |                            | 0.97                            | -                                   |
| Private                                   | 57  | 1.6% (0.6%, 3.8%)        |                                 |                                     | 2.5% (0.0%, 6.1%)          |                                 |                                     |
| Private and Medicare                      | 70  | 1.2% (0.5%, 2.3%)        |                                 |                                     | 1.3% (0.0%, 4.8%)          |                                 |                                     |
| Medicare/Other                            | 76  | 1.5% (0.5%, 3.1%)        |                                 |                                     | 1.5% (0.1%, 5.1%)          |                                 |                                     |
| <b>Live Alone</b>                         |     |                          | 0.31                            | -                                   |                            | 0.97                            | -                                   |
| No                                        | 153 | 1.3% (0.5%, 2.9%)        |                                 |                                     | 1.3% (0.0%, 5.6%)          |                                 |                                     |
| Yes                                       | 50  | 1.8% (1.1%, 3.6%)        |                                 |                                     | 2.1% (0.1%, 5.1%)          |                                 |                                     |
| <b>Employment Status</b>                  |     |                          | 0.48                            | -                                   |                            | 0.97                            | -                                   |
| Employed/Self-employed                    | 76  | 1.4% (0.5%, 3.0%)        |                                 |                                     | 1.9% (0.0%, 5.2%)          |                                 |                                     |
| Retired                                   | 118 | 1.4% (0.5%, 3.2%)        |                                 |                                     | 1.0% (0.0%, 5.7%)          |                                 |                                     |
| Unemployed                                | 9   | 1.7% (1.4%, 2.5%)        |                                 |                                     | 1.1% (0.5%, 4.8%)          |                                 |                                     |
| <b>BMI (kg/m<sup>2</sup>)<sup>c</sup></b> |     |                          | 0.57                            | -                                   |                            | 0.99                            | -                                   |
| Underweight/Normal weight (<25)           | 72  | 1.5% (0.5%, 3.6%)        |                                 |                                     | 1.0% (0.0%, 4.9%)          |                                 |                                     |

|                                                                      | N   | Daytime % Time <54 mg/dL |                                 |                                     | Nighttime % Time <54 mg/dL |                                 |                                     |
|----------------------------------------------------------------------|-----|--------------------------|---------------------------------|-------------------------------------|----------------------------|---------------------------------|-------------------------------------|
|                                                                      |     | Median (Q1, Q3)          | Univariate P-Value <sup>a</sup> | Multivariate P-Value <sup>a,b</sup> | Median (Q1, Q3)            | Univariate P-Value <sup>a</sup> | Multivariate P-Value <sup>a,b</sup> |
| Overweight (25-29.9)                                                 | 75  | 1.6% (0.8%, 3.2%)        | 0.10                            | -                                   | 2.3% (0.4%, 5.8%)          | 0.97                            | -                                   |
| Obese (≥30)                                                          | 53  | 1.2% (0.4%, 2.4%)        |                                 |                                     | 0.8% (0.0%, 3.5%)          |                                 |                                     |
| <b>T1D Duration (years)<sup>c</sup></b>                              |     |                          |                                 |                                     |                            |                                 |                                     |
| <25                                                                  | 51  | 1.2% (0.3%, 2.0%)        |                                 |                                     | 1.1% (0.0%, 6.8%)          |                                 |                                     |
| 25-<50                                                               | 107 | 1.4% (0.6%, 3.4%)        | 0.03                            | 0.14                                | 1.3% (0.0%, 4.2%)          | 0.97                            | -                                   |
| ≥50                                                                  | 45  | 1.6% (0.6%, 3.2%)        |                                 |                                     | 1.9% (0.4%, 5.8%)          |                                 |                                     |
| <b>Age at Diagnosis (years)<sup>c</sup></b>                          |     |                          |                                 |                                     |                            |                                 |                                     |
| <25                                                                  | 75  | 2.2% (0.8%, 3.8%)        |                                 |                                     | 1.9% (0.4%, 5.6%)          |                                 |                                     |
| 25-<50                                                               | 95  | 1.3% (0.5%, 3.0%)        |                                 |                                     | 1.2% (0.0%, 5.2%)          |                                 |                                     |
| ≥50                                                                  | 33  | 1.2% (0.2%, 1.6%)        |                                 |                                     | 0.8% (0.0%, 5.1%)          |                                 |                                     |
| <b>Insulin Delivery Method</b>                                       |     |                          | 0.98                            | -                                   |                            | 0.64                            | 0.47                                |
| Injections                                                           | 95  | 1.4% (0.5%, 3.4%)        | 0.07                            | 0.06                                | 2.5% (0.0%, 6.1%)          | 0.97                            | -                                   |
| Pump                                                                 | 108 | 1.5% (0.6%, 3.0%)        |                                 |                                     | 1.1% (0.0%, 4.5%)          |                                 |                                     |
| <b>Total Daily Insulin (units per kg of body weight)<sup>c</sup></b> |     |                          |                                 |                                     |                            |                                 |                                     |
| <0.5                                                                 | 89  | 1.2% (0.3%, 2.4%)        |                                 |                                     | 1.7% (0.0%, 5.5%)          |                                 |                                     |
| ≥0.5                                                                 | 103 | 1.7% (0.7%, 3.6%)        | 0.63                            | -                                   | 1.7% (0.1%, 5.6%)          | 0.97                            | -                                   |
| <b>Prior CGM use</b>                                                 |     |                          |                                 |                                     |                            |                                 |                                     |
| Prior CGM use                                                        | 93  | 1.4% (0.4%, 3.1%)        |                                 |                                     | 1.4% (0.0%, 5.5%)          |                                 |                                     |
| No prior CGM use                                                     | 110 | 1.4% (0.7%, 3.2%)        |                                 |                                     | 1.5% (0.0%, 5.5%)          |                                 |                                     |
| <b>Average BGM Checks Per Day<sup>c</sup></b>                        |     |                          | 0.32                            | -                                   |                            | 0.97                            | -                                   |
| <4                                                                   | 50  | 1.7% (0.6%, 3.4%)        | 0.06                            | -                                   | 2.1% (0.4%, 5.7%)          | 0.97                            | 0.54                                |
| ≥4                                                                   | 153 | 1.3% (0.5%, 2.9%)        |                                 |                                     | 1.4% (0.0%, 5.3%)          |                                 |                                     |
| <b>Detectable C-peptide</b>                                          |     |                          |                                 |                                     |                            |                                 |                                     |
| No                                                                   | 157 | 1.6% (0.7%, 3.3%)        |                                 |                                     | 1.7% (0.1%, 5.6%)          |                                 |                                     |
| Yes                                                                  | 46  | 1.2% (0.2%, 1.8%)        | <0.001                          | <0.001                              | 0.5% (0.0%, 4.0%)          | 0.97                            | -                                   |
| <b>Reduced Hypoglycemia Awareness</b>                                |     |                          |                                 |                                     |                            |                                 |                                     |
| Yes                                                                  | 61  | 2.4% (1.3%, 4.3%)        |                                 |                                     | 2.1% (0.1%, 5.7%)          |                                 |                                     |
| No                                                                   | 138 | 1.2% (0.4%, 2.6%)        |                                 |                                     | 1.3% (0.0%, 5.5%)          |                                 |                                     |

a. P-values have been adjusted for multiple comparisons using the adaptive Benjamini-Hochberg procedure to control the false discovery rate.

b. Only variables with P < 0.1 in a multivariate model were included in the final model. P-values are only given for variables that were selected in the final model.

c. Entered in the models as continuous variables. Categories are for displaying descriptive information only, not regression.



**Supplemental Table S3: CGM Measured Hyperglycemia**

|                                           | N   | % Time >180 mg/dL |                                 |                                     | % Time >250 mg/dL |                                 |                                     |
|-------------------------------------------|-----|-------------------|---------------------------------|-------------------------------------|-------------------|---------------------------------|-------------------------------------|
|                                           |     | Mean ± SD         | Univariate P-Value <sup>a</sup> | Multivariate P-Value <sup>a,b</sup> | Median (Q1, Q3)   | Univariate P-Value <sup>a</sup> | Multivariate P-Value <sup>a,b</sup> |
| <b>Overall</b>                            | 203 | 37% ± 16%         | -                               | -                                   | 12% (6%, 21%)     | -                               | -                                   |
| <b>Age (years)<sup>c</sup></b>            |     |                   | 0.42                            | -                                   |                   | 0.27                            | -                                   |
| 60-<65                                    | 55  | 40% ± 16%         |                                 |                                     | 14% (6%, 25%)     |                                 |                                     |
| 65-<70                                    | 82  | 37% ± 16%         |                                 |                                     | 11% (5%, 18%)     |                                 |                                     |
| ≥70                                       | 66  | 36% ± 16%         |                                 |                                     | 10% (6%, 19%)     |                                 |                                     |
| <b>Sex</b>                                |     |                   | 0.61                            | -                                   |                   | 0.67                            | -                                   |
| Female                                    | 105 | 36% ± 15%         |                                 |                                     | 10% (6%, 18%)     |                                 |                                     |
| Male                                      | 98  | 38% ± 17%         |                                 |                                     | 13% (6%, 21%)     |                                 |                                     |
| <b>Race/Ethnicity</b>                     |     |                   | 0.63                            | -                                   |                   | 0.63                            | -                                   |
| White non-Hispanic                        | 187 | 38% ± 16%         |                                 |                                     | 12% (6%, 21%)     |                                 |                                     |
| Non-White                                 | 14  | 34% ± 17%         |                                 |                                     | 9% (5%, 18%)      |                                 |                                     |
| <b>Annual Household Income</b>            |     |                   | 0.35                            | 0.02                                |                   | 0.25                            | 0.003                               |
| <\$35,000                                 | 21  | 35% ± 15%         |                                 |                                     | 11% (5%, 18%)     |                                 |                                     |
| \$35,000-<\$75,000                        | 43  | 40% ± 18%         |                                 |                                     | 15% (7%, 22%)     |                                 |                                     |
| ≥\$75,000                                 | 78  | 35% ± 15%         |                                 |                                     | 9% (6%, 18%)      |                                 |                                     |
| <b>Education Level</b>                    |     |                   | 0.61                            | -                                   |                   | 0.52                            | -                                   |
| High school or less                       | 12  | 32% ± 12%         |                                 |                                     | 9% (4%, 16%)      |                                 |                                     |
| Some college or college degree            | 128 | 38% ± 16%         |                                 |                                     | 13% (6%, 21%)     |                                 |                                     |
| Graduate or professional degree           | 61  | 37% ± 17%         |                                 |                                     | 9% (6%, 21%)      |                                 |                                     |
| <b>Health Insurance</b>                   |     |                   | 0.38                            | -                                   |                   | 0.34                            | -                                   |
| Private                                   | 57  | 41% ± 16%         |                                 |                                     | 14% (8%, 25%)     |                                 |                                     |
| Private and Medicare                      | 70  | 37% ± 16%         |                                 |                                     | 10% (6%, 20%)     |                                 |                                     |
| Medicare/Other                            | 76  | 35% ± 16%         |                                 |                                     | 11% (5%, 16%)     |                                 |                                     |
| <b>Live Alone</b>                         |     |                   | 0.67                            | -                                   |                   | 0.61                            | -                                   |
| No                                        | 153 | 37% ± 16%         |                                 |                                     | 11% (6%, 18%)     |                                 |                                     |
| Yes                                       | 50  | 39% ± 16%         |                                 |                                     | 13% (6%, 22%)     |                                 |                                     |
| <b>Employment Status</b>                  |     |                   | 0.007                           | 0.002                               |                   | 0.001                           | <0.001                              |
| Employed/Self-employed                    | 76  | 43% ± 16%         |                                 |                                     | 16% (8%, 25%)     |                                 |                                     |
| Retired                                   | 118 | 34% ± 15%         |                                 |                                     | 8% (5%, 15%)      |                                 |                                     |
| Unemployed                                | 9   | 42% ± 11%         |                                 |                                     | 21% (12%, 27%)    |                                 |                                     |
| <b>BMI (kg/m<sup>2</sup>)<sup>c</sup></b> |     |                   | 0.61                            | -                                   |                   | 0.61                            | -                                   |
| Underweight/Normal weight (<25)           | 72  | 37% ± 16%         |                                 |                                     | 11% (5%, 18%)     |                                 |                                     |

|                                                                      | N   | % Time >180 mg/dL |                                 |                                     | % Time >250 mg/dL |                                 |                                     |
|----------------------------------------------------------------------|-----|-------------------|---------------------------------|-------------------------------------|-------------------|---------------------------------|-------------------------------------|
|                                                                      |     | Mean ± SD         | Univariate P-Value <sup>a</sup> | Multivariate P-Value <sup>a,b</sup> | Median (Q1, Q3)   | Univariate P-Value <sup>a</sup> | Multivariate P-Value <sup>a,b</sup> |
| Overweight (25-29.9)                                                 | 75  | 37% ± 17%         | 0.41                            | -                                   | 10% (6%, 21%)     | 0.77                            | -                                   |
| Obese (≥30)                                                          | 53  | 40% ± 15%         |                                 |                                     | 12% (8%, 22%)     |                                 |                                     |
| <b>T1D Duration (years)<sup>c</sup></b>                              |     |                   |                                 |                                     |                   |                                 |                                     |
| <25                                                                  | 51  | 37% ± 16%         | 0.61                            | -                                   | 11% (5%, 19%)     | 0.76                            | -                                   |
| 25-<50                                                               | 107 | 39% ± 16%         |                                 |                                     | 12% (6%, 22%)     |                                 |                                     |
| ≥50                                                                  | 45  | 34% ± 16%         |                                 |                                     | 10% (6%, 16%)     |                                 |                                     |
| <b>Age at Diagnosis (years)<sup>c</sup></b>                          |     |                   | 0.61                            | -                                   |                   | 0.76                            | -                                   |
| <25                                                                  | 75  | 35% ± 15%         |                                 |                                     | 10% (6%, 18%)     |                                 |                                     |
| 25-<50                                                               | 95  | 39% ± 17%         |                                 |                                     | 12% (6%, 23%)     |                                 |                                     |
| ≥50                                                                  | 33  | 38% ± 17%         | 0.97                            | -                                   | 11% (5%, 21%)     | 0.96                            | -                                   |
| <b>Insulin Delivery Method</b>                                       |     |                   |                                 |                                     |                   |                                 |                                     |
| Injections                                                           | 95  | 37% ± 17%         |                                 |                                     | 11% (6%, 21%)     |                                 |                                     |
| Pump                                                                 | 108 | 37% ± 16%         | 0.02                            | 0.03                                | 12% (6%, 20%)     | 0.003                           | 0.004                               |
| <b>Total Daily Insulin (units per kg of body weight)<sup>c</sup></b> |     |                   |                                 |                                     |                   |                                 |                                     |
| <0.5                                                                 | 89  | 33% ± 15%         |                                 |                                     | 9% (5%, 15%)      |                                 |                                     |
| ≥0.5                                                                 | 103 | 41% ± 16%         | 0.65                            | -                                   | 15% (7%, 25%)     | 0.72                            | -                                   |
| <b>Prior CGM use</b>                                                 |     |                   |                                 |                                     |                   |                                 |                                     |
| Prior CGM use                                                        | 93  | 37% ± 14%         |                                 |                                     | 11% (6%, 18%)     |                                 |                                     |
| No prior CGM use                                                     | 110 | 38% ± 18%         | 0.10                            | -                                   | 12% (5%, 22%)     | 0.05                            | -                                   |
| <b>Average BGM Checks Per Day<sup>c</sup></b>                        |     |                   |                                 |                                     |                   |                                 |                                     |
| <4                                                                   | 50  | 38% ± 17%         |                                 |                                     | 14% (5%, 21%)     |                                 |                                     |
| ≥4                                                                   | 153 | 37% ± 16%         | 0.75                            | -                                   | 10% (6%, 19%)     | 0.50                            | -                                   |
| <b>Detectable C-peptide</b>                                          |     |                   |                                 |                                     |                   |                                 |                                     |
| No                                                                   | 157 | 38% ± 16%         |                                 |                                     | 12% (6%, 21%)     |                                 |                                     |
| Yes                                                                  | 46  | 37% ± 16%         | 0.38                            | 0.25                                | 9% (5%, 18%)      | 0.93                            | -                                   |
| <b>Reduced Hypoglycemia Awareness</b>                                |     |                   |                                 |                                     |                   |                                 |                                     |
| Yes                                                                  | 61  | 35% ± 15%         |                                 |                                     | 11% (6%, 17%)     |                                 |                                     |
| No                                                                   | 138 | 38% ± 16%         |                                 |                                     | 12% (5%, 21%)     |                                 |                                     |

a. P-values have been adjusted for multiple comparisons using the adaptive Benjamini-Hochberg procedure to control the false discovery rate.

b. Only variables with P < 0.1 in a multivariate model were included in the final model. P-values are only given for variables that were selected in the final model.

c. Entered in the models as continuous variables. Categories are for displaying descriptive information only, not regression.

**Supplemental Table S4: HbA1c**

|                                             | N   | HbA1c (%)     |                                 |                                     |
|---------------------------------------------|-----|---------------|---------------------------------|-------------------------------------|
|                                             |     | Mean $\pm$ SD | Univariate P-Value <sup>a</sup> | Multivariate P-Value <sup>a,b</sup> |
| <b>Overall</b>                              | 203 | 7.5 $\pm$ 0.9 | -                               | -                                   |
| <b>Age (years)<sup>c</sup></b>              |     |               | 0.34                            | -                                   |
| 60-<65                                      | 55  | 7.7 $\pm$ 1.0 |                                 |                                     |
| 65-<70                                      | 82  | 7.4 $\pm$ 0.8 |                                 |                                     |
| $\geq$ 70                                   | 66  | 7.5 $\pm$ 0.8 |                                 |                                     |
| <b>Sex</b>                                  |     |               | 0.58                            | -                                   |
| Female                                      | 105 | 7.6 $\pm$ 0.9 |                                 |                                     |
| Male                                        | 98  | 7.5 $\pm$ 0.8 |                                 |                                     |
| <b>Race/Ethnicity</b>                       |     |               | 0.57                            | -                                   |
| White non-Hispanic                          | 187 | 7.5 $\pm$ 0.9 |                                 |                                     |
| Non-White                                   | 14  | 7.3 $\pm$ 0.9 |                                 |                                     |
| <b>Annual Household Income</b>              |     |               | 0.42                            | 0.07                                |
| <\$35,000                                   | 21  | 7.4 $\pm$ 1.1 |                                 |                                     |
| \$35,000-<\$75,000                          | 43  | 7.7 $\pm$ 0.8 |                                 |                                     |
| $\geq$ \$75,000                             | 78  | 7.5 $\pm$ 0.8 |                                 |                                     |
| <b>Education Level</b>                      |     |               | 0.49                            | -                                   |
| High school or less                         | 12  | 7.3 $\pm$ 0.9 |                                 |                                     |
| Some college or college degree              | 128 | 7.6 $\pm$ 0.9 |                                 |                                     |
| Graduate or professional degree             | 61  | 7.4 $\pm$ 0.9 |                                 |                                     |
| <b>Health Insurance</b>                     |     |               | 0.09                            | -                                   |
| Private                                     | 57  | 7.8 $\pm$ 1.0 |                                 |                                     |
| Private and Medicare                        | 70  | 7.5 $\pm$ 0.8 |                                 |                                     |
| Medicare/Other                              | 76  | 7.4 $\pm$ 0.7 |                                 |                                     |
| <b>Live Alone</b>                           |     |               | 0.70                            | -                                   |
| No                                          | 153 | 7.5 $\pm$ 0.8 |                                 |                                     |
| Yes                                         | 50  | 7.6 $\pm$ 1.0 |                                 |                                     |
| <b>Employment Status</b>                    |     |               | <0.001                          | <0.001                              |
| Employed/Self-employed                      | 76  | 7.8 $\pm$ 0.8 |                                 |                                     |
| Retired                                     | 118 | 7.3 $\pm$ 0.8 |                                 |                                     |
| Unemployed                                  | 9   | 8.1 $\pm$ 1.3 |                                 |                                     |
| <b>BMI (kg/m<sup>2</sup>)<sup>c</sup></b>   |     |               | 0.46                            | -                                   |
| Underweight/Normal weight (<25)             | 72  | 7.5 $\pm$ 0.9 |                                 |                                     |
| Overweight (25-29.9)                        | 75  | 7.5 $\pm$ 0.9 |                                 |                                     |
| Obese ( $\geq$ 30)                          | 53  | 7.7 $\pm$ 0.8 |                                 |                                     |
| <b>T1D Duration (years)<sup>c</sup></b>     |     |               | 0.46                            | -                                   |
| <25                                         | 51  | 7.6 $\pm$ 0.9 |                                 |                                     |
| 25-<50                                      | 107 | 7.6 $\pm$ 0.9 |                                 |                                     |
| $\geq$ 50                                   | 45  | 7.3 $\pm$ 0.8 |                                 |                                     |
| <b>Age at Diagnosis (years)<sup>c</sup></b> |     |               | 0.68                            | -                                   |
| <25                                         | 75  | 7.4 $\pm$ 1.0 |                                 |                                     |
| 25-<50                                      | 95  | 7.6 $\pm$ 0.8 |                                 |                                     |
| $\geq$ 50                                   | 33  | 7.6 $\pm$ 0.8 |                                 |                                     |
| <b>Insulin Delivery Method</b>              |     |               | 0.58                            | -                                   |
| Injections                                  | 95  | 7.6 $\pm$ 0.9 |                                 |                                     |
| Pump                                        | 108 | 7.5 $\pm$ 0.9 |                                 |                                     |

|                                                                      | N   | HbA1c (%)     |                                 |                                     |
|----------------------------------------------------------------------|-----|---------------|---------------------------------|-------------------------------------|
|                                                                      |     | Mean $\pm$ SD | Univariate P-Value <sup>a</sup> | Multivariate P-Value <sup>a,b</sup> |
| <b>Total Daily Insulin (units per kg of body weight)<sup>c</sup></b> |     |               | 0.27                            | -                                   |
| <0.5                                                                 | 89  | 7.4 $\pm$ 0.9 |                                 |                                     |
| $\geq$ 0.5                                                           | 103 | 7.7 $\pm$ 0.9 |                                 |                                     |
| <b>Prior CGM use</b>                                                 |     |               | 0.74                            | -                                   |
| Prior CGM use                                                        | 93  | 7.5 $\pm$ 0.8 |                                 |                                     |
| No prior CGM use                                                     | 110 | 7.5 $\pm$ 1.0 |                                 |                                     |
| <b>Average BGM Checks Per Day<sup>c</sup></b>                        |     |               | 0.10                            | 0.34                                |
| <4                                                                   | 50  | 7.7 $\pm$ 1.1 |                                 |                                     |
| $\geq$ 4                                                             | 153 | 7.5 $\pm$ 0.8 |                                 |                                     |
| <b>Detectable C-peptide</b>                                          |     |               | 0.70                            | -                                   |
| No                                                                   | 157 | 7.5 $\pm$ 0.9 |                                 |                                     |
| Yes                                                                  | 46  | 7.6 $\pm$ 0.8 |                                 |                                     |
| <b>Reduced Hypoglycemia Awareness</b>                                |     |               | 0.47                            | -                                   |
| Yes                                                                  | 61  | 7.4 $\pm$ 1.0 |                                 |                                     |
| No                                                                   | 138 | 7.6 $\pm$ 0.8 |                                 |                                     |

- a. P-values have been adjusted for multiple comparisons using the adaptive Benjamini-Hochberg procedure to control the false discovery rate.
- b. Only variables with  $P < 0.1$  in a multivariate model were included in the final model. P-values are only given for variables that were selected in the final model.
- c. Entered in the models as continuous variables. Categories are for displaying descriptive information only, not regression
